# Supplementary material
Source: PubMed Central journal article supplement (PMC3428095)

**Supplemental Table 1.** MicroRNAs regulated by ZEB1.

| <i>down-regulated</i> |                             |                                                                                |                                                                                                                    |
|-----------------------|-----------------------------|--------------------------------------------------------------------------------|--------------------------------------------------------------------------------------------------------------------|
| <b>miRNAs</b>         | <b>function<sup>†</sup></b> | <b>cancer</b>                                                                  | <b>roles [representative target]</b>                                                                               |
| miR-34a               | TS                          | prostate cancer (1)                                                            | inhibits clonogenic expansion, tumor regeneration, and metastasis [CD44]                                           |
| miR-210               | TS                          | head & neck and pancreatic cancer (2)                                          | regulates the hypoxic response of tumor cells and tumor growth                                                     |
| miR-326               | TS                          | medulloblastoma (3)                                                            | induces differentiation, cell maturation and growth inhibition                                                     |
| miR-224               | TS                          | ovarian cancer (4)                                                             | inhibits cell proliferation                                                                                        |
| miR-193a              | TS                          | acute myeloid leukemia (5)                                                     | induces growth inhibition, apoptosis and differentiation [c-KIT]                                                   |
| miR-370               | TS                          | cholangiocarcinoma (6)                                                         | down-regulated by IL-6 [MAP3K8]                                                                                    |
| miR-331               | -                           |                                                                                |                                                                                                                    |
| miR-183               | TS<br>OG                    | pancreatic and colorectal cancer (7)<br>rhabdomyosarcoma, and colon cancer (8) | suppresses expression of stem cell factors in cancer cells<br>promotes tumor cell migration [EGR1]                 |
| miR-96                | TS<br>OG                    | pancreatic cancer (9)<br>breast cancer (10)                                    | inhibits Akt signaling and induces apoptosis [KRAS]<br>[FOXO1]                                                     |
| miR-182               | OG                          | breast cancer (10)                                                             | [FOXO1]                                                                                                            |
| miR-141               | TS                          | breast cancer (11)                                                             | suppresses EMT [ZEB1]                                                                                              |
| miR-200b              | TS                          | breast cancer (11)                                                             | suppresses EMT [ZEB1]                                                                                              |
| miR-200c              | TS                          | breast cancer (11)                                                             | suppresses EMT [ZEB1]                                                                                              |
| miR-200a              | TS                          | breast cancer (11)                                                             | suppresses EMT [ZEB1]                                                                                              |
| miR-206               | TS                          | rhabdomyosarcoma (12)                                                          | inhibits cell proliferation and migration [c-MET]                                                                  |
| miR-148a              | TS                          | gastric cancer (13)                                                            | suppresses tumor cell invasion and metastasis [ROCK1]                                                              |
| miR-605               | -                           |                                                                                |                                                                                                                    |
| miR-126               | TS                          | lung cancer (14)                                                               | inhibits proliferation by inducing G1 cell cycle arrest                                                            |
| miR-658               | -                           |                                                                                |                                                                                                                    |
| miR-92b               | -                           |                                                                                |                                                                                                                    |
| miR-467a              | -                           |                                                                                |                                                                                                                    |
| miR-297               | -                           |                                                                                |                                                                                                                    |
| miR-466               | -                           |                                                                                |                                                                                                                    |
| miR-203               | TS                          | pancreatic and colorectal cancer (7)                                           | suppresses expression of stem cell factors in cancer cells                                                         |
| miR-429               | TS                          | breast cancer (11)                                                             | suppresses EMT [ZEB1]                                                                                              |
| miR-516-5p            | -                           |                                                                                |                                                                                                                    |
| miR-555               | -                           |                                                                                |                                                                                                                    |
| <i>up-regulated</i>   |                             |                                                                                |                                                                                                                    |
| <b>miRNAs</b>         | <b>function<sup>†</sup></b> | <b>cancer</b>                                                                  | <b>roles [representative target]</b>                                                                               |
| miR-470               | -                           |                                                                                |                                                                                                                    |
| miR-581               | -                           |                                                                                |                                                                                                                    |
| miR-542-3p            | TS                          | colon cancer (15)                                                              | inhibits cell proliferation by inducing cell cycle arrest [BIRC5]                                                  |
| miR-351               | -                           |                                                                                |                                                                                                                    |
| miR-503               | TS                          | hepatocellular carcinoma (16)                                                  | inhibits proliferation, migration and invasion                                                                     |
| miR-324-5p            | TS                          | medulloblastoma (3)                                                            | induces differentiation, cell maturation and growth inhibition                                                     |
| miR-181a*             | -                           |                                                                                |                                                                                                                    |
| miR-140*              | -                           |                                                                                |                                                                                                                    |
| miR-142-5p            | TS                          | lung cancer (17)                                                               | represses lung cancer cell growth                                                                                  |
| miR-181b              | OG                          | hepatocellular carcinoma (18)                                                  | induced by TGFβ, enhances MMP2/9 activity and promoted growth, clonogenic survival, migration and invasion [TIMP3] |
|                       | TS                          | glioma (19)                                                                    | induces growth inhibition and apoptosis, and inhibits invasion                                                     |
| miR-99a               | TS                          | prostate cancer (20)                                                           | induces growth inhibition                                                                                          |
| miR-181a              | TS                          | glioma (19)                                                                    | induces growth inhibition and apoptosis, and inhibits invasion                                                     |
| miR-614               | -                           |                                                                                |                                                                                                                    |

|          |    |                               |                                                                                                                            |
|----------|----|-------------------------------|----------------------------------------------------------------------------------------------------------------------------|
| miR-181d | OG | hepatocellular carcinoma (18) | induced by TGF $\beta$ , enhances MMP2/9 activity and promoted growth, clonogenic survival, migration and invasion [TIMP3] |
| miR-298  | -  |                               |                                                                                                                            |
| miR-10a  | OG | pancreatic cancer (21)        | promotes metastasis [HOXB1/B3]                                                                                             |
| miR-344  | -  |                               |                                                                                                                            |
| miR-185  | TS | ovarian cancer (22)           | inhibits cell migration and tumor growth in vivo [SIX1]                                                                    |
| miR-181c | -  |                               |                                                                                                                            |

<sup>†</sup>TS: tumor suppressive, OG: oncogenic microRNAs

## References

1. Liu C, et al. The microRNA miR-34a inhibits prostate cancer stem cells and metastasis by directly repressing CD44. *Nat Med*. 2011;17(2):211-215.
2. Huang X, et al. Hypoxia-inducible mir-210 regulates normoxic gene expression involved in tumor initiation. *Mol Cell*. 2009;35(6):856-867.
3. Ferretti E, et al. Concerted microRNA control of Hedgehog signalling in cerebellar neuronal progenitor and tumour cells. *EMBO J*. 2008;27(19):2616-2627.
4. White NM, et al. Three dysregulated miRNAs control kallikrein 10 expression and cell proliferation in ovarian cancer. *Br J Cancer*. 2010;102(8):1244-1253.
5. Gao XN, et al. MicroRNA-193a represses c-kit expression and functions as a methylation-silenced tumor suppressor in acute myeloid leukemia. *Oncogene*. 2011;30(31):3416-3428.
6. Meng F, Wehbe-Janek H, Henson R, Smith H, Patel T. Epigenetic regulation of microRNA-370 by interleukin-6 in malignant human cholangiocytes. *Oncogene*. 2008;27(3):378-386.
7. Wellner U, et al. The EMT-activator ZEB1 promotes tumorigenicity by repressing stemness-inhibiting microRNAs. *Nat Cell Biol*. 2009;11(12):1487-1495.
8. Sarver AL, Li L, Subramanian S. MicroRNA miR-183 functions as an oncogene by targeting the transcription factor EGR1 and promoting tumor cell migration. *Cancer Res*. 2010;70(23):9570-9580.
9. Yu S, et al. miRNA-96 suppresses KRAS and functions as a tumor suppressor gene in pancreatic cancer. *Cancer Res*. 2010;70(14):6015-6025.
10. Guttilla IK, White BA. Coordinate regulation of FOXO1 by miR-27a, miR-96, and miR-182 in breast cancer cells. *J Biol Chem*. 2009;284(35):23204-23216.
11. Gregory PA, et al. The miR-200 family and miR-205 regulate epithelial to mesenchymal transition by targeting ZEB1 and SIP1. *Nat Cell Biol*. 2008;10(5):593-601.
12. Yan D, et al. MicroRNA-1/206 targets c-Met and inhibits rhabdomyosarcoma development. *J Biol Chem*. 2009;284(43):29596-29604.
13. Zheng B, et al. MicroRNA-148a Suppresses Tumor Cell Invasion and Metastasis by Downregulating ROCK1 in Gastric Cancer. *Clin Cancer Res*. 2011;17(24):7574-7583.
14. Miko E, et al. miR-126 inhibits proliferation of small cell lung cancer cells by targeting SLC7A5. *FEBS Lett*. 2011;585(8):1191-1196.
15. Yoon S, et al. Induction of growth arrest by miR-542-3p that targets survivin. *FEBS Lett*. 2010;584(18):4048-4052.
16. Zhou J, Wang W. Analysis of microRNA expression profiling identifies microRNA-503 regulates metastatic function in hepatocellular cancer cell. *J Surg Oncol*. 2011;104(3):278-283.
17. Liu X, et al. Uncovering growth-suppressive MicroRNAs in lung cancer. *Clin Cancer Res*. 2009;15(4):1177-1183.
18. Wang B, et al. TGFbeta-mediated upregulation of hepatic miR-181b promotes hepatocarcinogenesis by targeting TIMP3. *Oncogene*. 2010;29(12):1787-1797.

19. Shi L, et al. hsa-mir-181a and hsa-mir-181b function as tumor suppressors in human glioma cells. *Brain Res.* 2008;1236:185-193.
20. Sun D, et al. miR-99 family of MicroRNAs suppresses the expression of prostate-specific antigen and prostate cancer cell proliferation. *Cancer Res.* 2011;71(4):1313-1324.
21. Weiss FU, et al. Retinoic acid receptor antagonists inhibit miR-10a expression and block metastatic behavior of pancreatic cancer. *Gastroenterology.* 2009;137(6):2136-2145.
22. Imam JS, et al. MicroRNA-185 suppresses tumor growth and progression by targeting the Six1 oncogene in human cancers. *Oncogene.* 2010;29(35):4971-4979.

**Supplemental table 2. Q-PCR primers**

| <b>murine gene</b> | <b>forward (5'→3')</b>    | <b>reverse (5'→3')</b>  |
|--------------------|---------------------------|-------------------------|
| <i>Acbd3</i>       | AAACGTCCCAGCGTTGCCCTG     | ACAGACAGCAATGCGCCCTCC   |
| <i>Acs14</i>       | GTGAAGGCTCTGCTGGGAGGGA    | GCGCCGCCAGACAGCATCAT    |
| <i>Adam10</i>      | GCGGTAAACCCGTGAGGAGGC     | GTCGGCAACACCATCTTCCCCG  |
| <i>Adam17</i>      | AGAAGGTTTCCCAGAGAGGTGGTGG | GGAGACGCCGCCTCATGTTCC   |
| <i>Bmp7</i>        | CCGTAGTATCCGGTCCACGGGG    | GGAGCGATTCTGGCTGCGCT    |
| <i>Cdc42</i>       | CGGAGAAGCTGAGGACAAGATCT   | CACCATCACCAACAACAACACT  |
| <i>Cdh1</i>        | TACGGCGGTGGTGAGGACGA      | GCCACACGGGGGAGACTTGC    |
| <i>Chd2</i>        | CCTCCAGAGTTTACTGCCATGAC   | CCACCACTGATTCTGTATGCCG  |
| <i>Cln3</i>        | TTCAGCGGGTCAGGGCTGGT      | CTGGCGAGGTGACAGCCGAG    |
| <i>Crb3</i>        | CGGACCCTTTCACAAATAGCA     | CGTTGGACTCATCACCTGGG    |
| <i>Ctnnb1</i>      | GCCATCTTAAGCCCTCGCTCGG    | CACAGGACACGAGCTGACGG    |
| <i>DNp63</i>       | TTGTACCTGGAAAACAATG       | GCATCGTTTCACAACCTCG     |
| <i>E2f5</i>        | CGTTGCTGCAGGAGGGCGCA      | GCAGCCGCTTTGAGATCCAGGAC |
| <i>E2f8</i>        | GGGGGTCAAGATCCCAAAGCCCT   | CTAAGCGCACGACCGGGCAT    |
| <i>Galant7</i>     | GGAGCATGGGACTGGAGTATGCTCT | CGAGAGGTCAGAGGCACCCGT   |
| <i>Gmfb</i>        | AAGGGGCCCAAGAGATCGCACG    | TCCTTCCGGTCGTCAGCGGC    |
| <i>Hif1a</i>       | ACAAGCCGGGGGAGGACGAT      | AGCACCTTCCACGTTGCTGACT  |
| <i>Hspb1</i>       | CACGCAGTCAGCGGAGATCACC    | GGCGCGGGCCTCGAAAGTAA    |
| <i>Itgav</i>       | CACCTGGGGCATTAGCCGG       | GATCACCCACACAGGCACAGGC  |
| <i>Lepr</i>        | TCCCAGCAGCTATGGTCTCCCTT   | TGCTTTCAGGGTCTGGTGTGGTC |
| <i>Marcks</i>      | GTGGCCTCGTCGCCTTCCAAA     | TTACGTGGCCATTCTCCTGCCCA |
| <i>Plk4</i>        | CCTCCTGTGGACCCAAGCTGC     | TGCTTGCTGACGCCTGCTCT    |
| <i>Pxn</i>         | GGACGAGCTCATGGCGTCACT     | TCCCCTGGGCCATGAACTTGAAA |
| <i>Rpl32 (L32)</i> | GGAGAAGGTTCAAGGGCCAG      | TGCTCCATAACCGATGTTTG    |
| <i>Scrib</i>       | CCCAGGAAGGCCGTGGCAAG      | GCCTCAGCCAGCCGTTCCAA    |
| <i>Smad3</i>       | AGAGGGAACCGGCACTGCTCA     | GTGTGCCTCCAGAAGCCGCC    |
| <i>Snai1</i>       | CCCAAGCCGTAGAGCTGA        | GCTTTTGCCACTGTCCTCATC   |
| <i>Snai2</i>       | ATCCTCACCTCGGGAGCATA      | TGCCGACGATGTCCATACAG    |
| <i>T</i>           | ATCCACCCAGACTCGCCCAATT    | CTCTCACGATGTGAATCCGAGG  |
| <i>T2</i>          | TCCACCTCCCTTGCTAACATGG    | CTCTTGGTGGAACATCTGCCTG  |
| <i>TAp63</i>       | TGTATCCGCATGCAAGACTC      | CCGGGTAATCTGTGTTGGAG    |
| <i>Tgfb1</i>       | GCTGCCCCCTGGCTCAGAGAC     | AGGCTGGAGGTGGGGTCAGGA   |
| <i>Tshz1</i>       | AGGTCACCAATGGCTGCGGC      | CCGGCGAGTGGTCCGTGATG    |
| <i>Twist1</i>      | TCGACTTCCCTGTACCAGGTCTT   | CCATCTTGGAGTCCAGCTCG    |
| <i>Vcl</i>         | GCCTCAGATGCTGGTCGCTGG     | CGGTTGGCCCGACGAGCAAT    |
| <i>Vim</i>         | GCGTGCGGCTGCTTCAAGAC      | ATGGCGTCGGCCAGCGAGAA    |
| <i>Wif1</i>        | CGGAACCTGCCACGAACCCA      | CGTGCCAGCCCTCTCGACAC    |
| <i>Zeb1</i>        | GCTCAGCCAGGAACCCGCAG      | TGGGCACCCTCTGCCACACA    |
| <i>Zeb2</i>        | AGGCGCGAGAGAAAGGGCAC      | CCCGTTTCATCAGCAGCTCGG   |
| <b>human gene</b>  | <b>forward (5'→3')</b>    | <b>reverse (5'→3')</b>  |
| <i>ARHGAP1</i>     | CACCACCGAGGGCATCTTCCG     | CCGGACCACTTGGGTGTTGGC   |
| <i>CDH1</i>        | GACACACCCCCTGTTGGTGT      | CAGCCATCCTGTTTCTTTCAA   |
| <i>CDH2</i>        | ATCTCGGGTCAGCTGTCCG       | GGCTATCTGCTCGCGATCC     |
| <i>RPL32 (L32)</i> | CCTTGTGAAGCCCAAGATCG      | TGCCGGATGAACTTCTTGGT    |
| <i>SNAI2</i>       | TGTGTGGACTACCGCTGCTC      | GAGAGGCCATTGGGTAGCTG    |
| <i>VIM</i>         | GGAACAGCATGTCCAAATCGA     | GCCGTGAGGTGAGGCTTG      |
| <i>ZEB1</i>        | CACTGGTGGTGGCCATTAC       | TGCACCATGCCCTGAGG       |

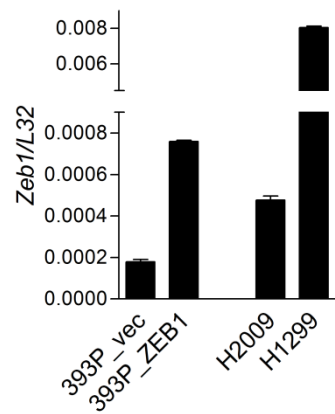

**Supplemental Figure 1.** Ectopic *Zeb1* levels in 393P\_ZEB1 cells relative to that of endogenous *ZEB1* levels in human lung cancer cells.

Q-PCR analysis of *Zeb1* mRNA levels. Results normalized on the basis of snoRNA-135. Mean±SD, n=3.

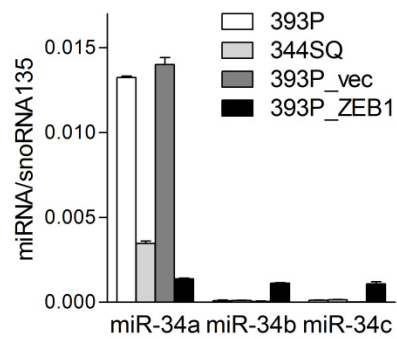

**Supplemental Figure 2.** ZEB1 down-regulates the expression of miR-34a but not miR-34b or miR-34c.

Q-PCR analysis of miR-34a, -34b, and -34c expression in KP cells with high ZEB1 (344SQ and 393P\_ZEB1) or low ZEB1 (393P and 393P\_vec). Mean $\pm$ SD, n=3. P-value, two-tailed Student's t-test.

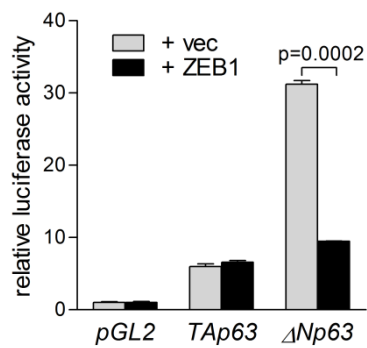

**Supplemental Figure 3.** ZEB1 down-regulates  $\Delta Np63$  but not  $TAp63$  promoter activity.

Luciferase activity in 393P cells co-transfected with ZEB1 (+ ZEB1) or empty (+ vec) expression vectors and pGL2 reporter plasmids subcloned with promoters from  $TAp63$  or  $\Delta Np63$  genes or nothing (pGL2). Results expressed relative to pGL2 transfectants, which was set at 1.0. Mean $\pm$ SD, n=3. P-value, two-tailed Student's t-test.

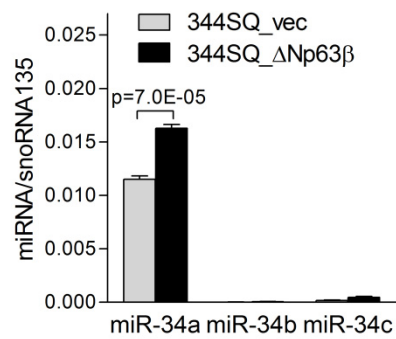

**Supplemental Figure 4.**  $\Delta$ Np63 $\beta$  up-regulates the expression of miR-34a but not miR-34b or miR-34c.

Q-PCR analysis of miR-34a, -34b, and -34c levels. Results normalized on the basis of snoRNA-135. Mean $\pm$ SD, n=3. P-value, two-tailed Student's t-test.



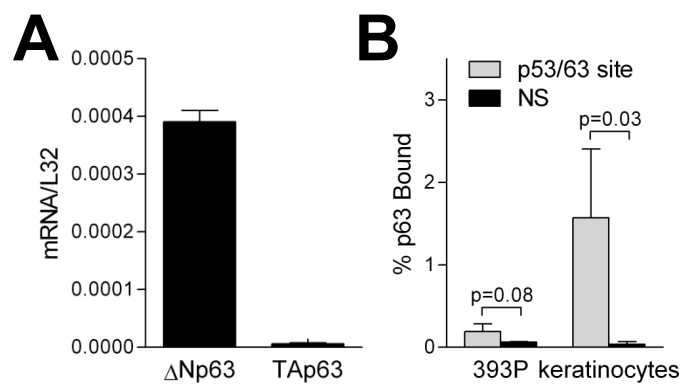

**Supplemental Figure 5.** 344SQ cells express primarily  $\Delta Np63$  isoforms, which bind to the miR-34a promoter.

(A) Q-PCR analysis of  $\Delta Np63$  and TAp63 isoforms in 344SQ cells using primers that recognize all alternatively spliced variants ( $\alpha$ ,  $\beta$ , and  $\gamma$ ) of  $\Delta Np63$  and TAp63 gene transcripts. Values were normalized on the basis of L32 levels. Mean $\pm$ SD, n=3. (B) Binding of endogenous p63 to the miR-34a promoter in 393P cells (left bar graph) and mouse primary keratinocytes isolated from E18.5 day embryos (right bar graph). Graph denotes DNA amount at specific (p53/p63) and non-specific (NS) sites of the miR-34a promoter precipitated by anti-p63 antibody corrected for non-specific binding activity by IgG precipitation and expressed as % p63 bound. Mean $\pm$ SD, n=3. P-values are indicated (two-tailed Student's t-test).

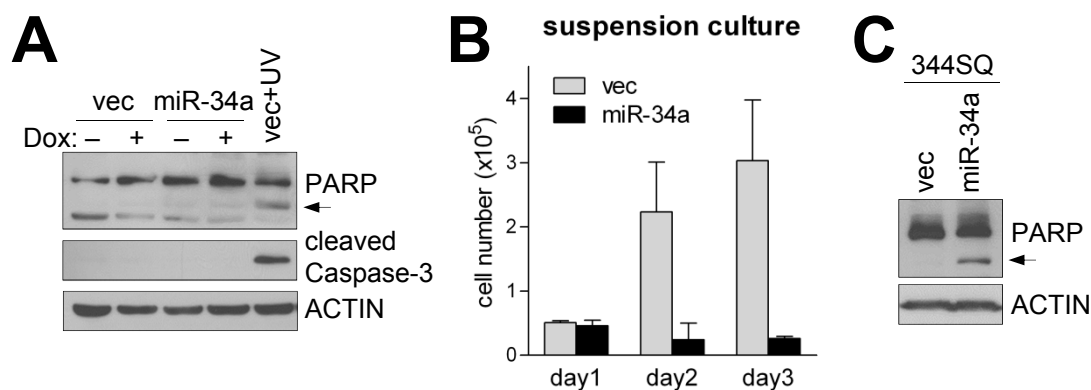

**Supplemental Figure 6.** Ectopic miR-34a expression induces apoptosis of 344SQ cells in anchorage-independent but not anchorage-dependent conditions.

(**A**) Western blot analysis of PARP and cleaved Caspase-3 in adherent 344SQ\_vec and 344SQ\_miR-34a cells cultured in the presence or absence of doxycycline (Dox). UV-irradiated (250 J/m<sup>2</sup>, 24 h-incubation) 344SQ\_vec cells were used as a positive control. Cleaved PARP band (arrow). ACTIN used as loading control. (**B** and **C**) 344SQ\_vec and 344SQ\_miR-34a cells were cultured in suspension on low-adhesion plates and counted (**B**) or subjected to western blot analysis of PARP (**C**) at day 2. Mean±SD, n=4. Cleaved PARP band (arrow). ACTIN used as loading control.

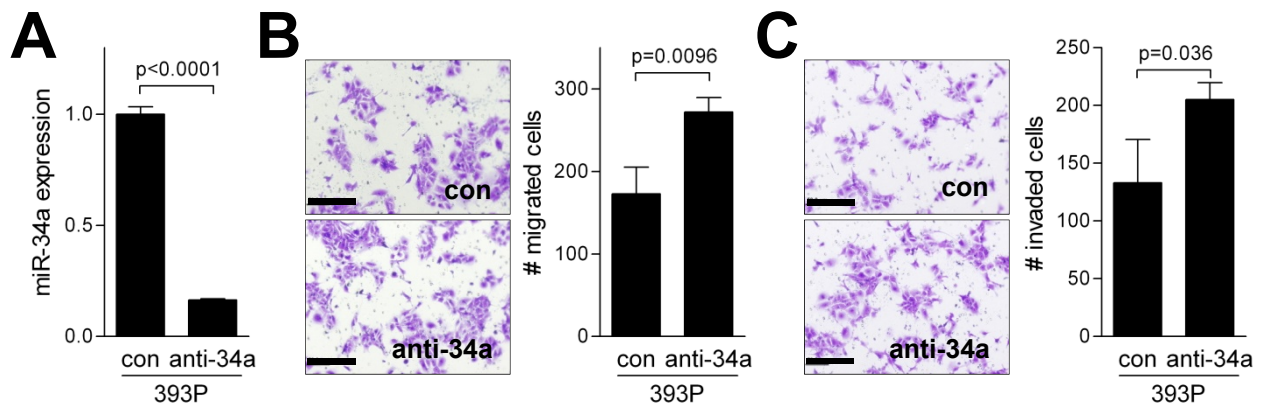

**Supplemental Figure 7.** miR-34a hairpin inhibitor enhances the migration and invasion of 393P cells.

(A) Q-PCR quantification of miR-34a in 393P cells transiently transfected with 100 nM of miRIDIAN<sup>®</sup> negative control (con) or miR-34a hairpin inhibitor (anti-34a). Migrating (B) and invading (C) cells in Boyden chambers were photographed (images) and counted (bar graphs). Scale bars=100  $\mu$ m. Mean $\pm$ SD, n=3. P-values, two-tailed Student's t-test.

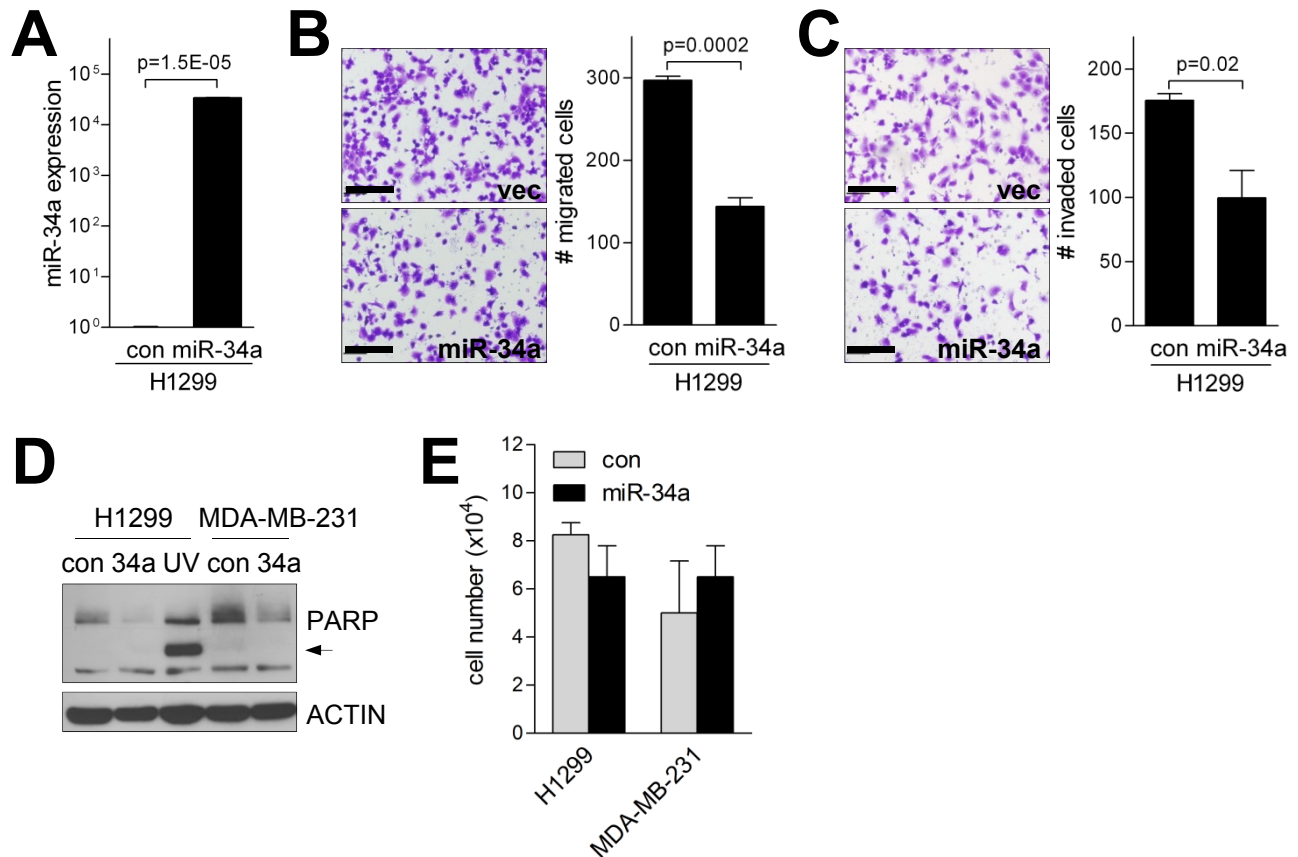

**Supplemental Figure 8.** miR-34a inhibits the migration and invasion of H1299 human lung cancer cells.

(A) Q-PCR quantification of miR-34a levels in H1299 cells transiently transfected with 40 nM of Pre-miR™ negative control (con) or Pre-miR-34a (miR-34a). Mean±SD, n=3. Migrating (B) and invading (C) cells in Boyden chambers were photographed (images) and counted (bar graphs) (Scale bars=100 μm. Mean±SD, n=3. P-values, two-tailed Student's t-test. (D and E) To exclude the possibility that the reduced migration and invasion was a consequence of apoptosis or reduced proliferation, H1299 cells and MDA-MB-231 cells were transiently transfected with 40 nM of Pre-miR™ negative control (con) or Pre-miR-34a (miR-34a), seeded in equal numbers onto 24-well plates, and subjected to western blot analysis of PARP (D) or counted (E) after 24 hrs. UV-irradiated (250 J/m<sup>2</sup>, 24 h-incubation) H1299 cells were used as a positive control for PARP cleavage (arrow). ACTIN used as loading control. Mean±SD, n=4.

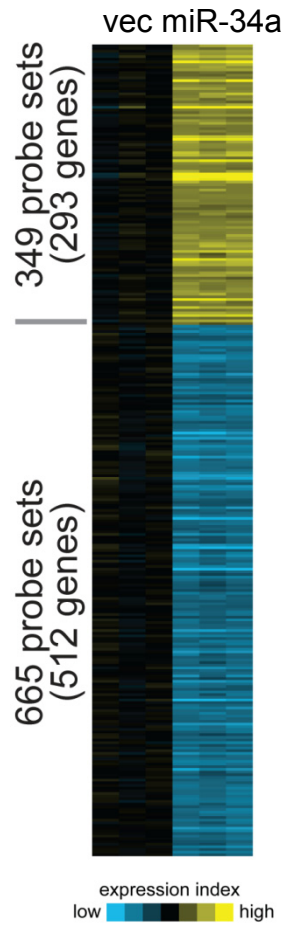

**Supplemental Figure 9.** Global mRNA profiling of tumors. Heat map depiction of 805 mRNAs up- or down-regulated in 344SQ\_miR-34a (miR-34a) tumors, using 344SQ\_vector tumors (vec) as the reference. Scale bar at bottom.

**A**

| Symbol        | Gene Title                                                                           | fold <sup>†</sup> | P-value |
|---------------|--------------------------------------------------------------------------------------|-------------------|---------|
| <i>Wif1</i>   | Wnt inhibitory factor 1                                                              | 15.1446           | 0.00471 |
| <i>Hspb1</i>  | Heat shock protein 1                                                                 | 10.1599           | 0.03498 |
| <i>Lepr</i>   | Leptin receptor                                                                      | 7.2687            | 0.00152 |
| <i>Marcks</i> | Myristoylated alanine rich protein kinase C substrate*                               | 0.6462            | 0.00152 |
| <i>Cln3</i>   | Chloride channel 3*                                                                  | 0.6321            | 0.00123 |
| <i>Galnt7</i> | UDP-N-acetyl-alpha-D-galactosamine: polypeptide N-acetylgalactosaminyltransferase 7* | 0.6273            | 0.00320 |
| <i>Tshz1</i>  | Teashirt zinc finger family member 1*                                                | 0.6257            | 0.00689 |
| <i>Hif1a</i>  | Hypoxia inducible factor 1, alpha subunit                                            | 0.6018            | 0.00080 |
| <i>Cdc42</i>  | Cell division cycle 42 homolog                                                       | 0.5862            | 0.00056 |
| <i>Smad3</i>  | MAD homolog 3                                                                        | 0.5855            | 0.00171 |
| <i>Adam17</i> | A disintegrin and metallopeptidase domain 17                                         | 0.5770            | 0.00131 |
| <i>E2f5</i>   | E2F transcription factor 5*                                                          | 0.5487            | 0.00086 |
| <i>Vcl</i>    | Vinculin*                                                                            | 0.5350            | 0.00155 |
| <i>Adam10</i> | A disintegrin and metallopeptidase domain 10                                         | 0.5348            | 0.00196 |
| <i>Acs14</i>  | Acyl-CoA synthetase long-chain family member 4*                                      | 0.5142            | 0.00097 |
| <i>Pxn</i>    | Paxillin                                                                             | 0.4999            | 0.00364 |
| <i>Ctnnb1</i> | Catenin (cadherin associated protein), beta 1                                        | 0.4805            | 0.00163 |
| <i>Plk4</i>   | Polo-like kinase 4                                                                   | 0.4745            | 0.00063 |
| <i>Acbd3</i>  | Acyl-Coenzyme A binding domain containing 3*                                         | 0.4724            | 0.00081 |
| <i>E2f8</i>   | E2F transcription factor 8                                                           | 0.4452            | 0.00185 |
| <i>Itgav</i>  | Integrin alpha V                                                                     | 0.4448            | 0.00306 |
| <i>Bmp7</i>   | Bone morphogenetic protein 7                                                         | 0.4377            | 0.00173 |
| <i>Tgfb1</i>  | Transforming growth factor, beta receptor I                                          | 0.4322            | 0.00059 |
| <i>Gmfb</i>   | Glia maturation factor, beta*                                                        | 0.3683            | 0.00288 |

**B**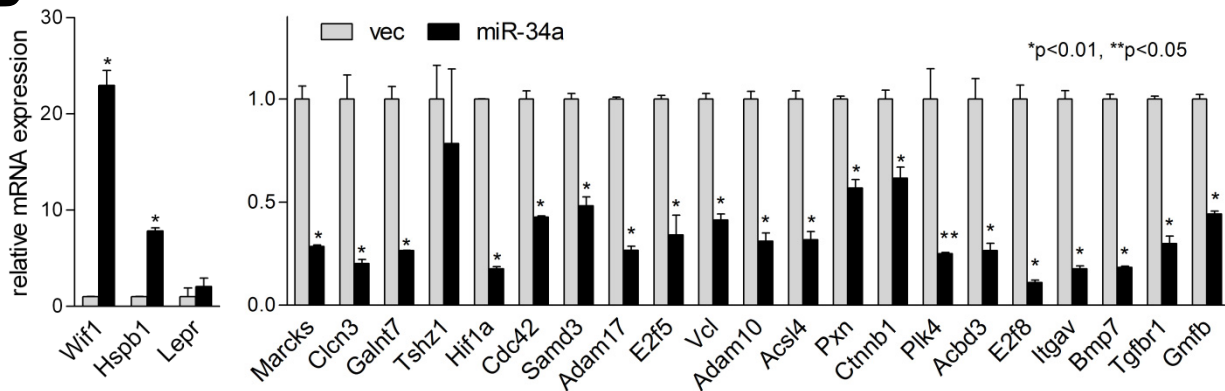

**Supplemental Figure 10.** Q-PCR confirmation of mRNAs up- or down-regulated in microarrays. (A) List of genes tested by Q-PCR analysis. <sup>†</sup>fold = miR-34a/vector; P-values, two-tailed Student's t-test; \*putative miR-34a targets from TargetScan. (B) Q-PCR analysis of mRNAs in 344SQ\_vector (vec) and 344SQ\_miR-34a (miR-34a) tumor samples. Mean $\pm$ SD, n=3 RNA samples. Results expressed relative to that of 344SQ\_vector, which was set at 1.0. \*p<0.01, \*\*p<0.05 (two-tailed Student's t-test).

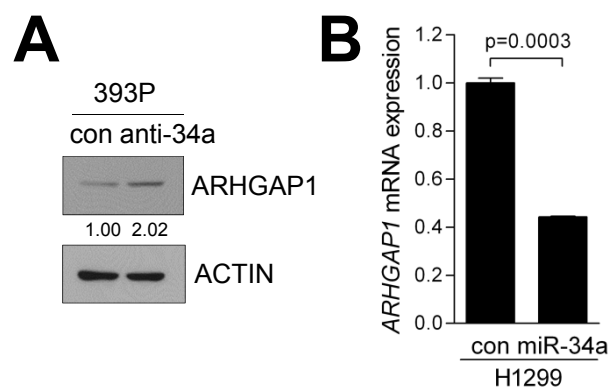

**Supplemental Figure 11.** miR-34a down-regulates ARHGAP1 expression.

(A) Western blot analysis of ARHGAP1 and ACTIN in 393P cells transiently transfected with 100 nM of miRIDIAN® negative control (con) or miR-34a hairpin inhibitor (anti-34a). Densitometric analysis of ARHGAP1 protein levels normalized to those of ACTIN and expressed relative to control transfectants, which was set at 1.0. (B) Q-PCR analysis of *ARHGAP1* mRNA levels in H1299 human lung cancer cells 72 hrs after transient transfection with Pre-miR™ negative control (con) or Pre-miR-34a (miR-34a). Results normalized on the basis of mRNA for ribosomal protein *L32*. Mean±SD, n=3. P-value, two-tailed Student's t-test.

# Full uncut blots-1

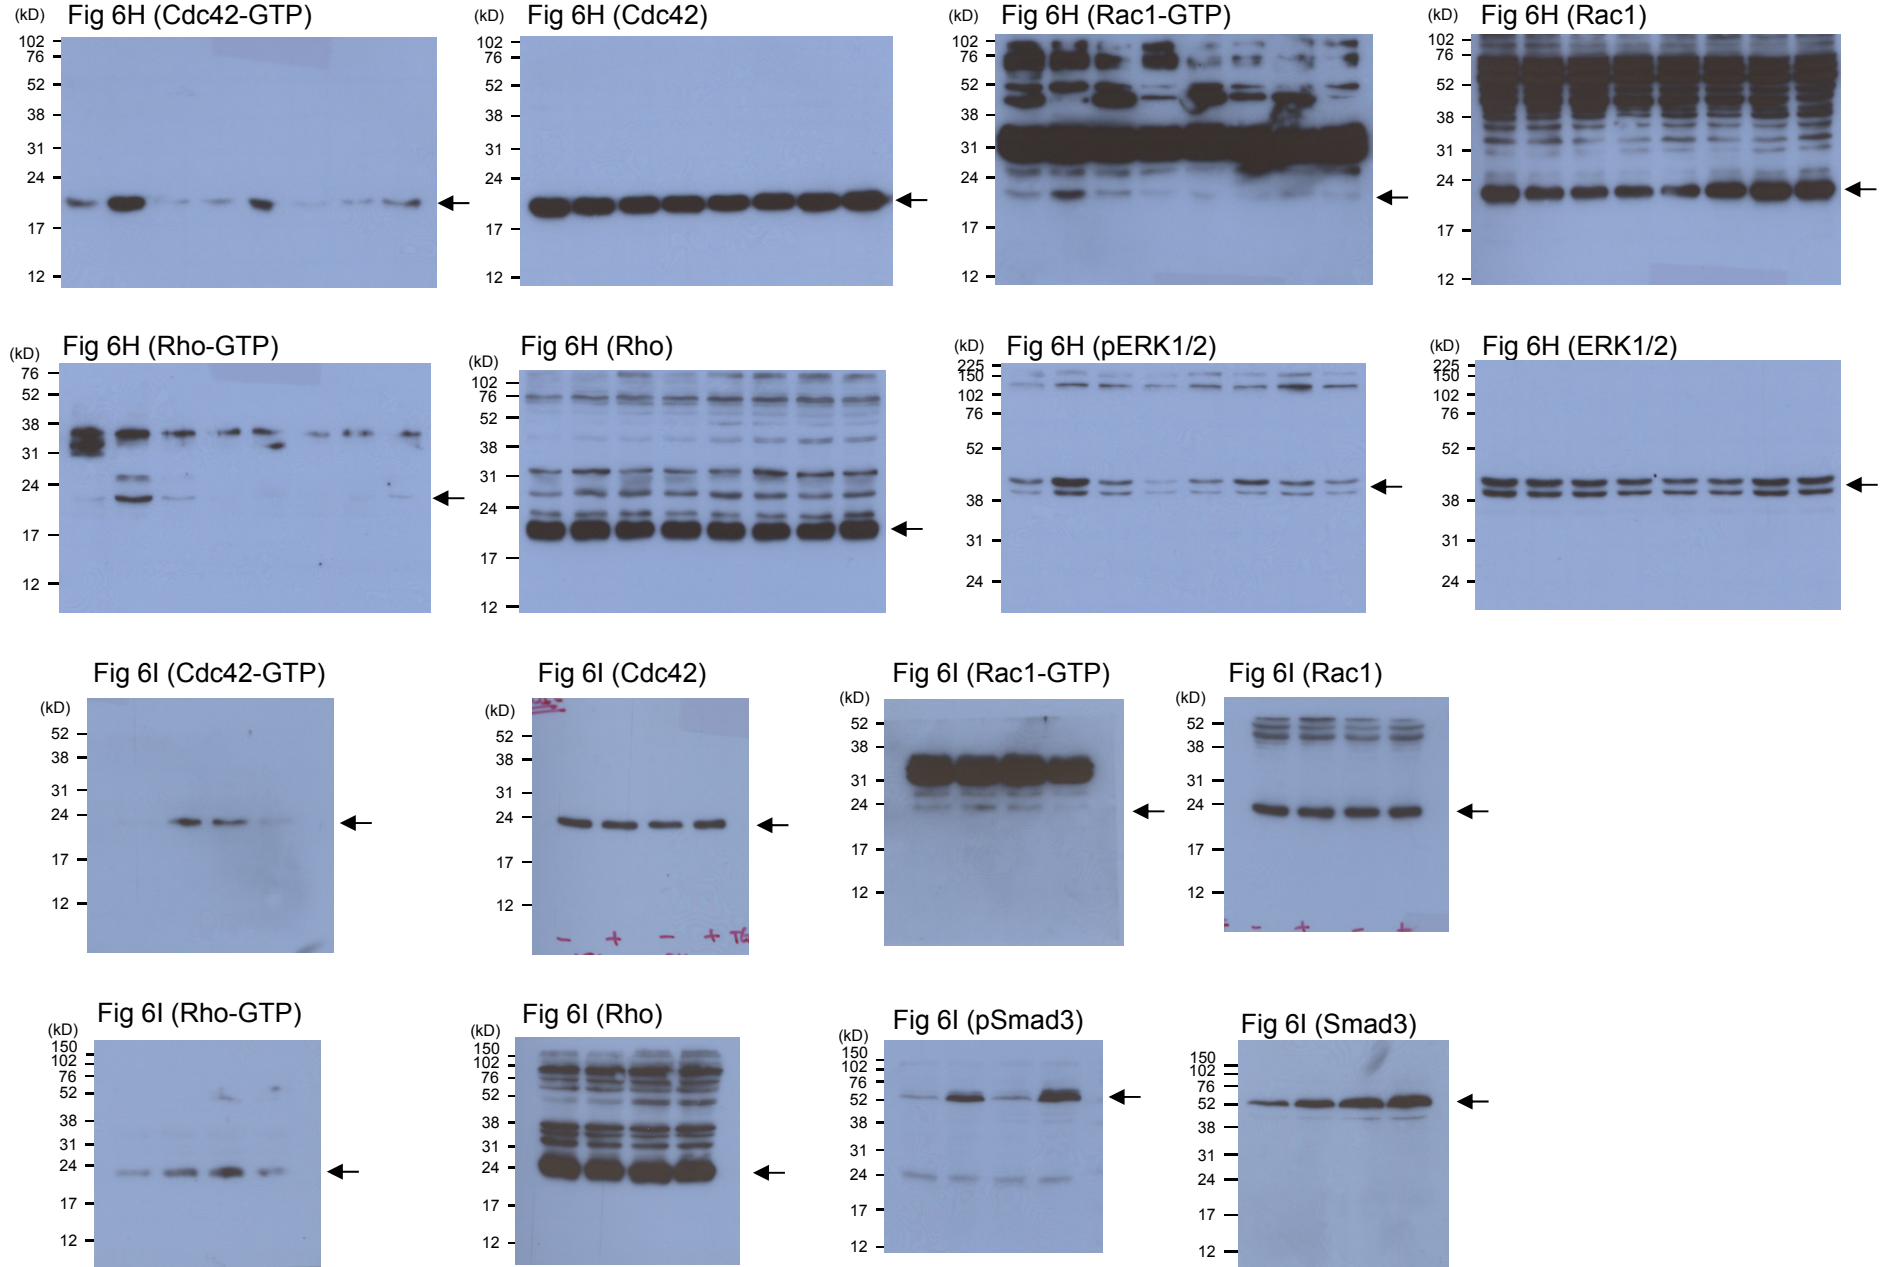



# Full uncut blots-2

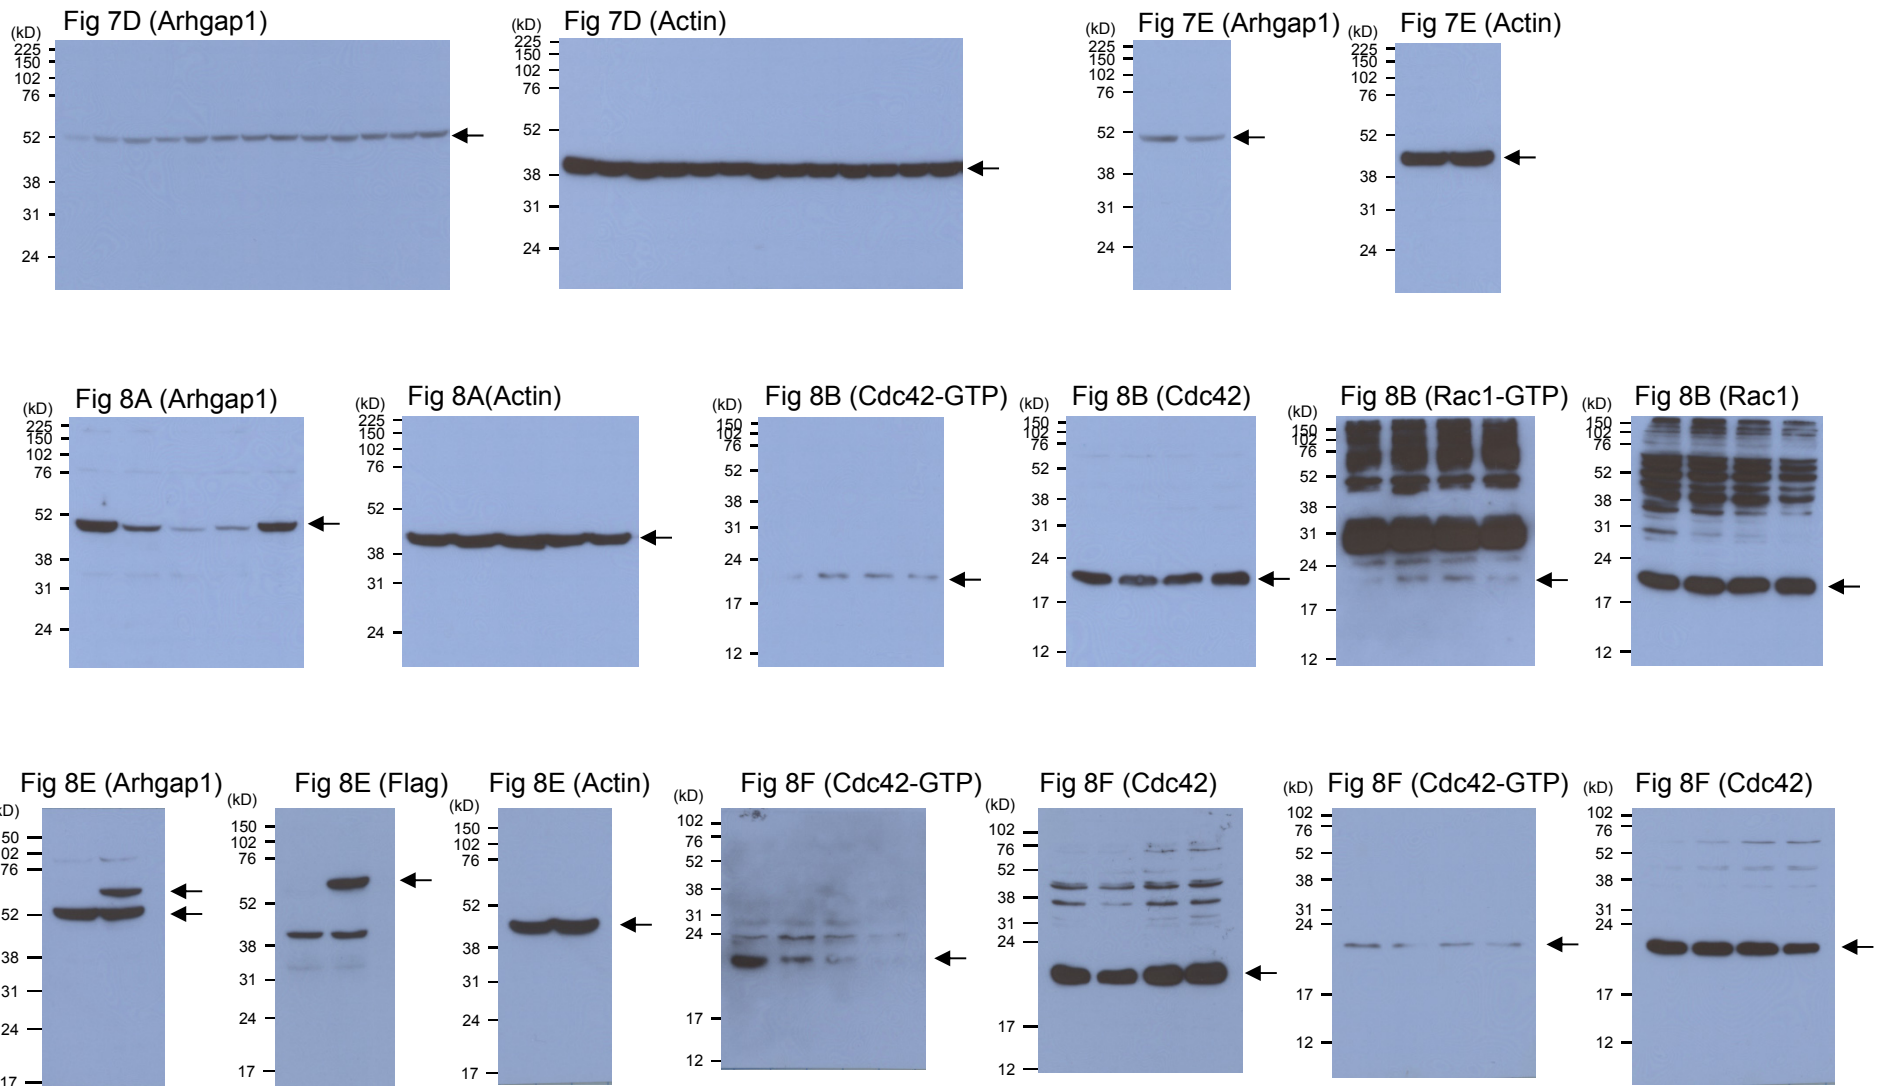

# Full uncut blots-3

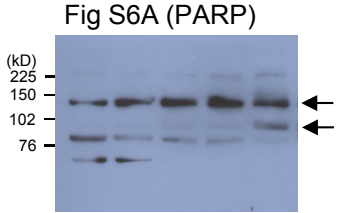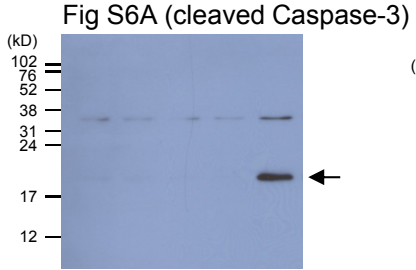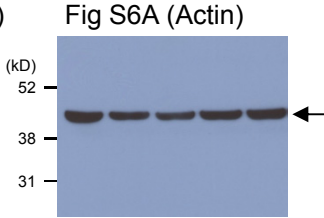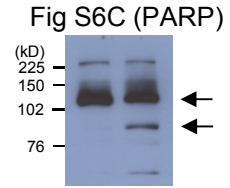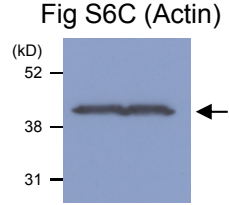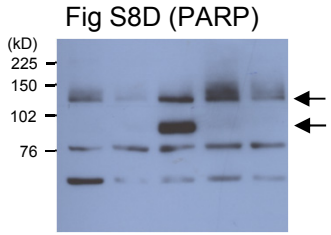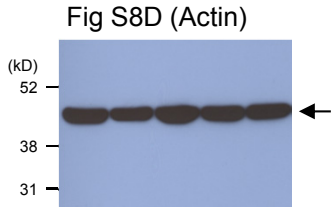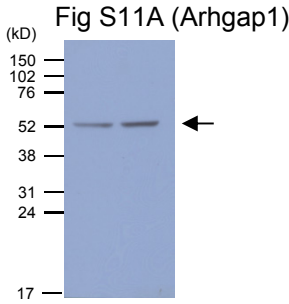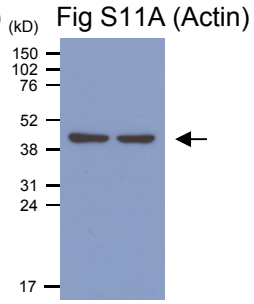

Supplement: JCI63608sd.pdf [file JCI63608sd.pdf]
